# Supplementary material
Source: Research Square preprint supplement (doi:10.21203/rs.3.rs-9803530/v1)
Supplement: Supplementary file 1 [file 7b7a0e0019c1c3d9fb0d514c.docx]

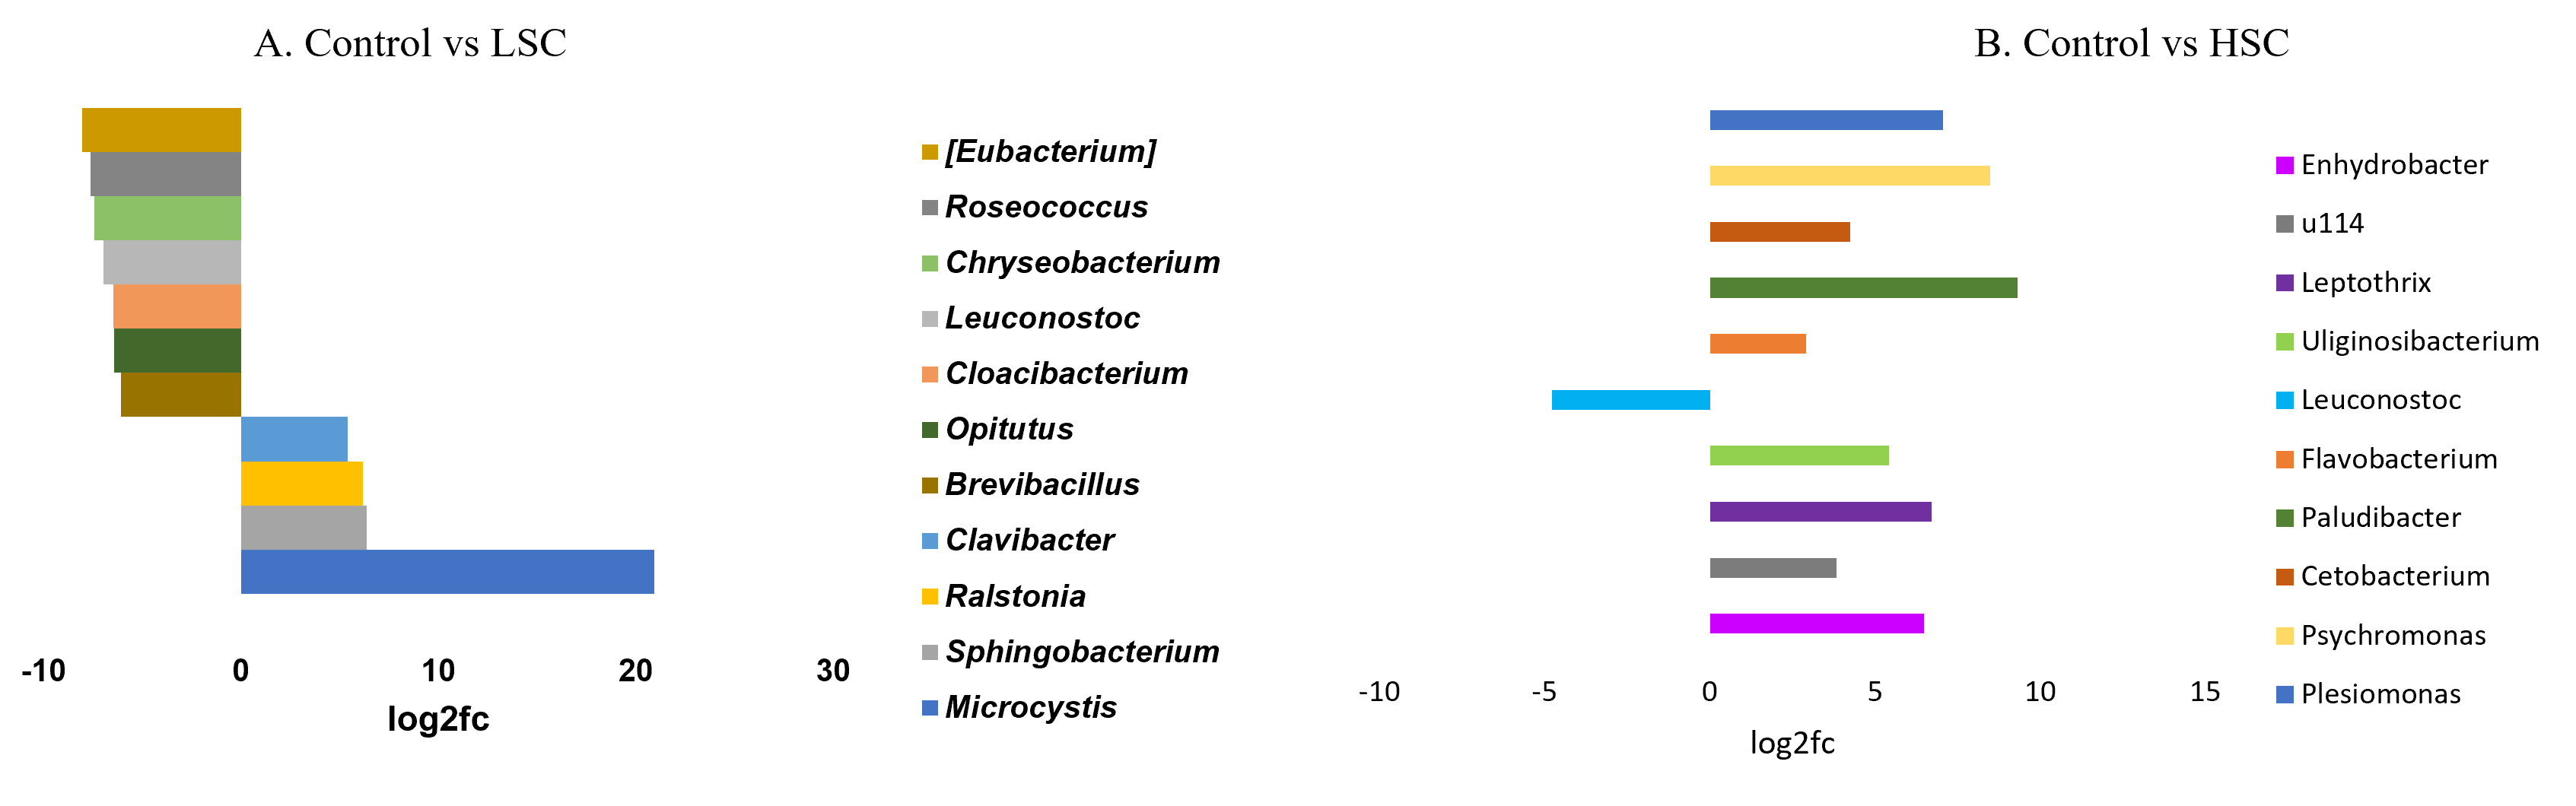


Fig. 1: The bar plot illustrates the log2fold change in the relative abundance of significantly altered bacterial genera between control and LSC (A); control and HSC (B). Positive values indicate enrichment in control, while negative values indicate enrichment in treatment. Taxa are color-coded according to the legend.


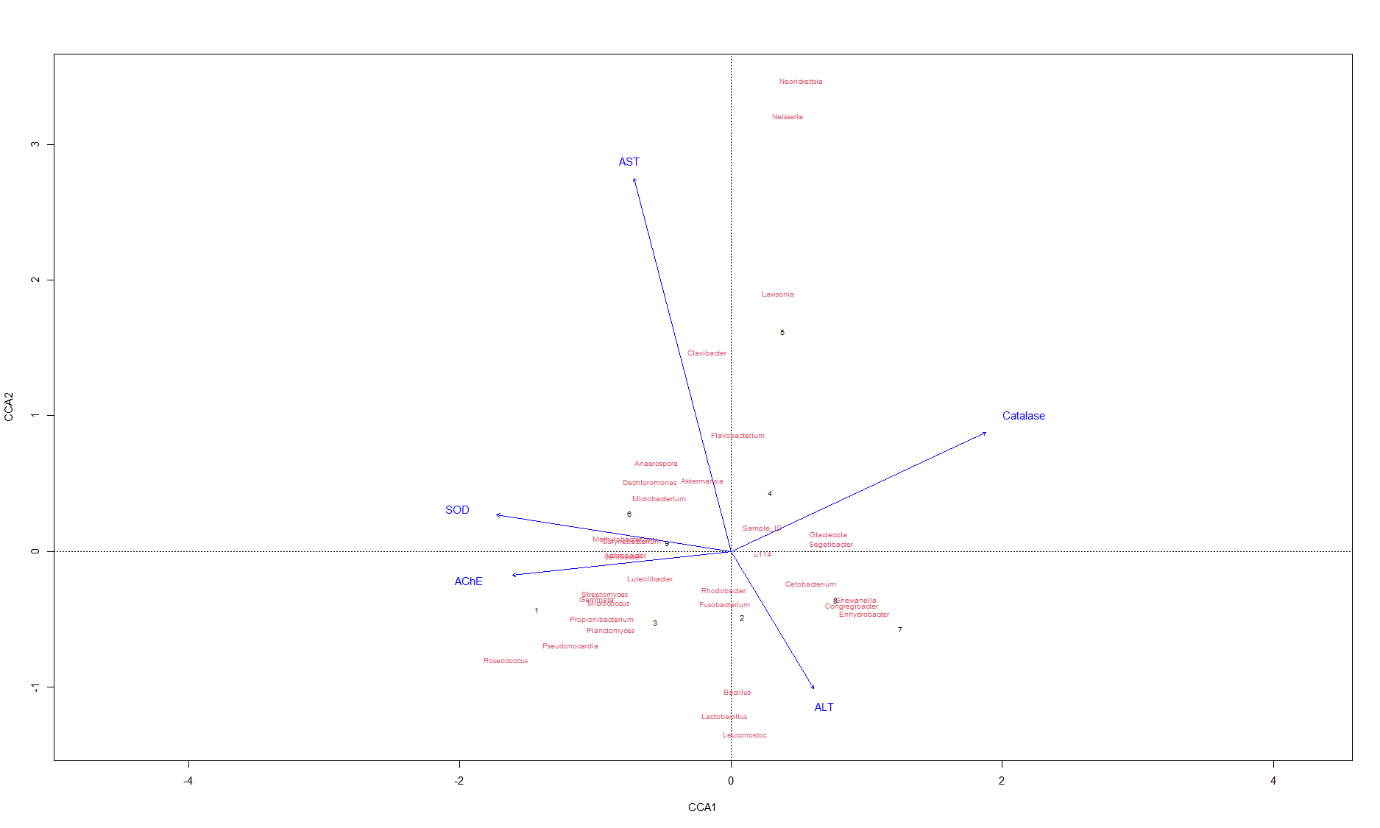
Fig_ 2: CCA biplot displaying correlation between rohu gut microbiota treated with TFM and host enzymatic activity.

Table 1: Topological description of the cooccurrence network

| Description | Control | LSC | HSC |
| --- | --- | --- | --- |
| Nodes | 20 | 19 | 20 |
| Edges | 83 | 59 | 190 |
| Average degree | 8.3 | 6.211 | 19 |
| Density | 0.437 | 0.345 | 1 |
| Modularity | 0.28 | 0.383 | 0 |
| Clustering coefficient | 0.858 | 0.868 | 1 |
| Average path length | 1.162 | 1.52 | 1 |
| % of Positive interaction | 50.6 | 89.83 | 73.16 |
| % of negative interaction | 49.4 | 10.17 | 26.84 |
